# Supplementary material for: Pandemic Risk Assessment for Swine Influenza A Virus in Comparative In Vitro and In Vivo Models
Source: Viruses. 2024 Mar 31;16(4):548. doi: 10.3390/v16040548 (PMC11053818; doi:10.3390/v16040548)
Supplement: Supplementary file 1 [file viruses-16-00548-s001.zip › viruses-2919230-supplementary.pdf]

**Figure S1**

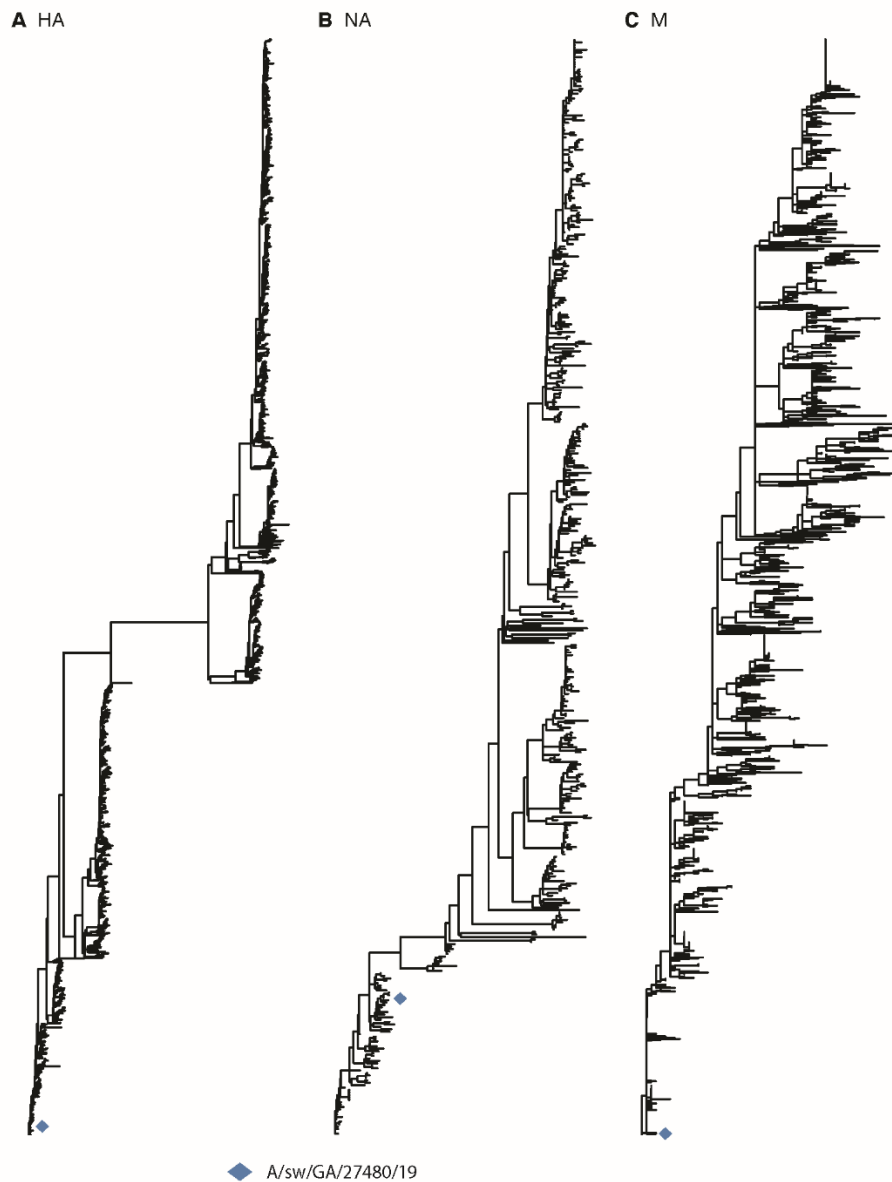

**Figure S1. Maximum likelihood phylogeny for swine isolates collected between 2014 and 2019.** Phylogenetic reconstructions for the hemagglutinin (A), neuraminidase (B) and matrix (C) genes within the context of U.S. swine influenza A isolates representing the 5 year period prior to isolation of the GA/19 virus.

**Figure S2**

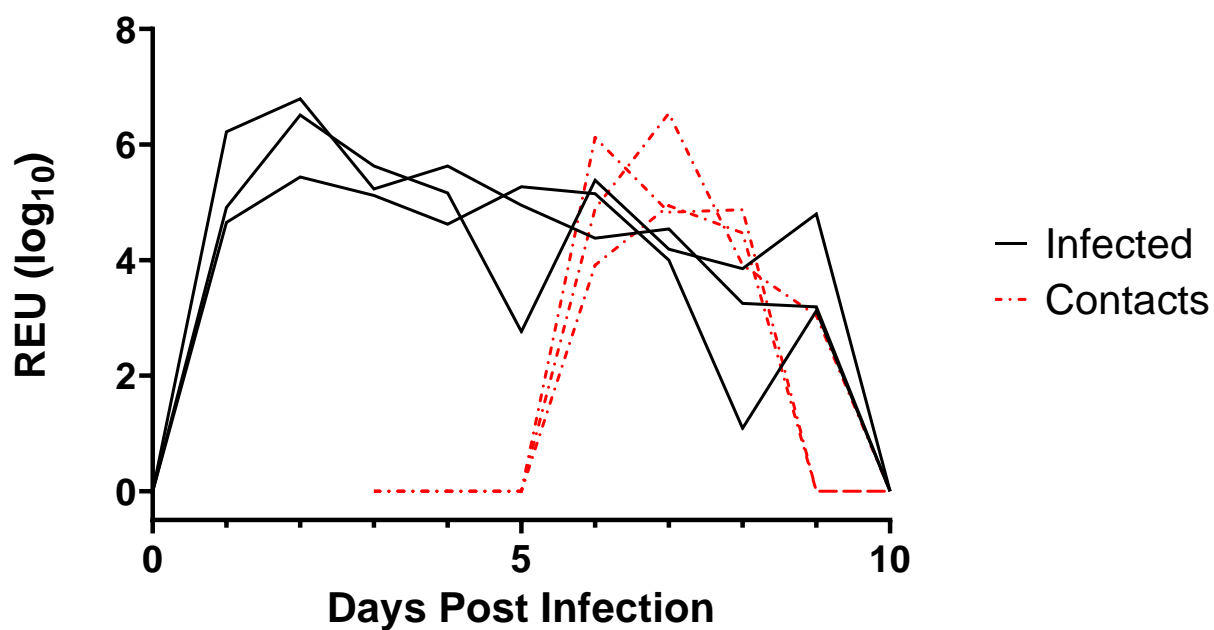

**Figure S2. Nasal shedding of A/sw/GA/27480/19 (H1N2) in swine as determined by qPCR.**

Infected animals showed peak viral loads by 2 dpi, remaining positive until day 9. All three contact animals became positive by 3 dpi, two remaining positive until day 8 and one until day 9.

**Figure S3**

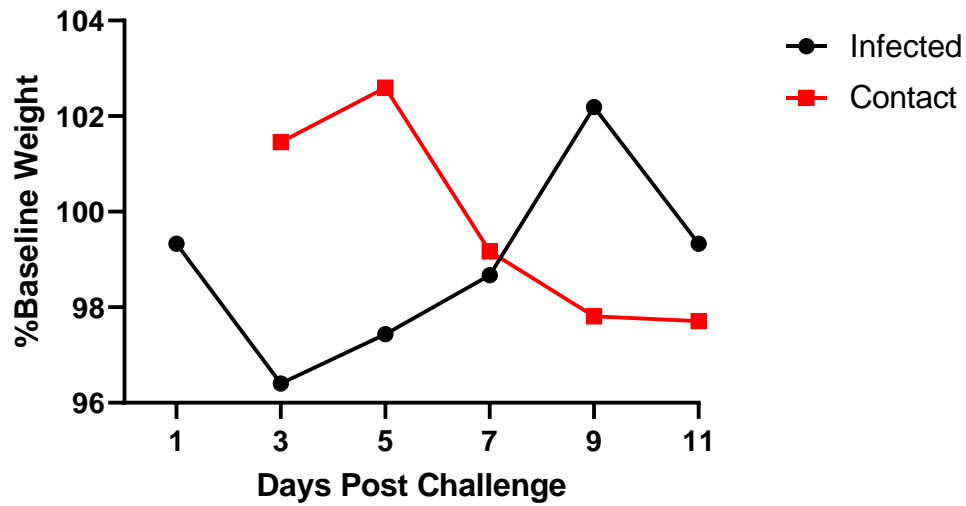

**Figure S3. Weight loss in ferrets post-challenge with A/sw/GA/27480/19 (H1N2).** Weight measurements were taken until 11 dpi. Infected animals experienced an initial decrease in weight before returning to baseline levels. Contact animals experienced a comparable decrease in weight corresponding to an onset of viral shedding.

**Figure S4**

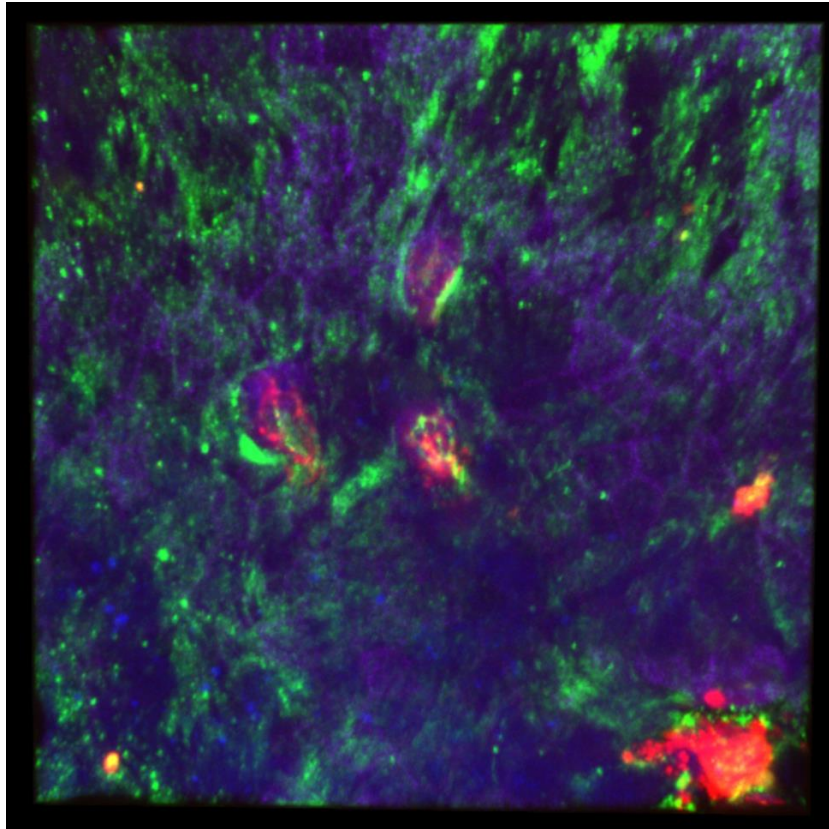

**Figure S4. Confocal image of NHBE cells infected with GA/19 at 96 hours post-infection.**

Despite showing minimal viral replication, NHBE cultures infected with GA/19 showed clear evidence of viral invasion. Red foci indicate cells infected with the swine influenza isolate. Red: viral nucleoprotein, blue: nuclear stain, purple: F-actin, green: beta tubulin.

Figure S5

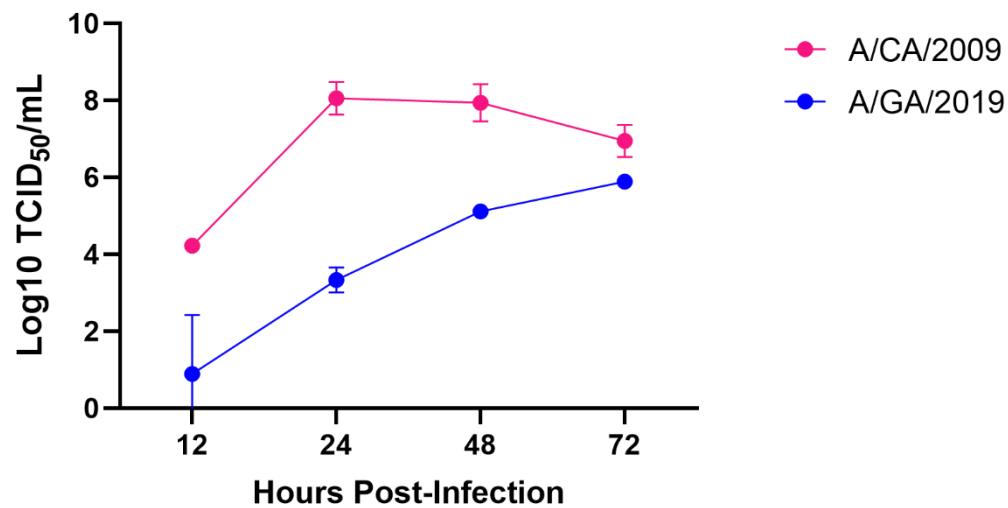

| Experiment | Donor Sex | Donor Age | Donor Race | Doubling Time (hours) |
|------------|-----------|-----------|------------|-----------------------|
| 1          | M         | 56        | C          | 27                    |
| 2          | F         | 66        | B & H      | 31                    |

**Figure S5. Replication kinetics of GA/19 compared to CA/09 in an NHBE cells from an alternate donor.** Cultures were infected apically with either GA/19 or CA/09 at an MOI of 0.001. At 12, 24, 48, and 72 hours post-infection the apical surface of cultures were washed and the fluid titered for virus by TCID<sub>50</sub>. Error bars indicate mean ± SD.
